# Supplementary material
Source: Springer Nature journal article supplement (https://www.springermedizin.de/resource/supplementary/12916_2011_499_MOESM3_ESM.pdf/9599790)

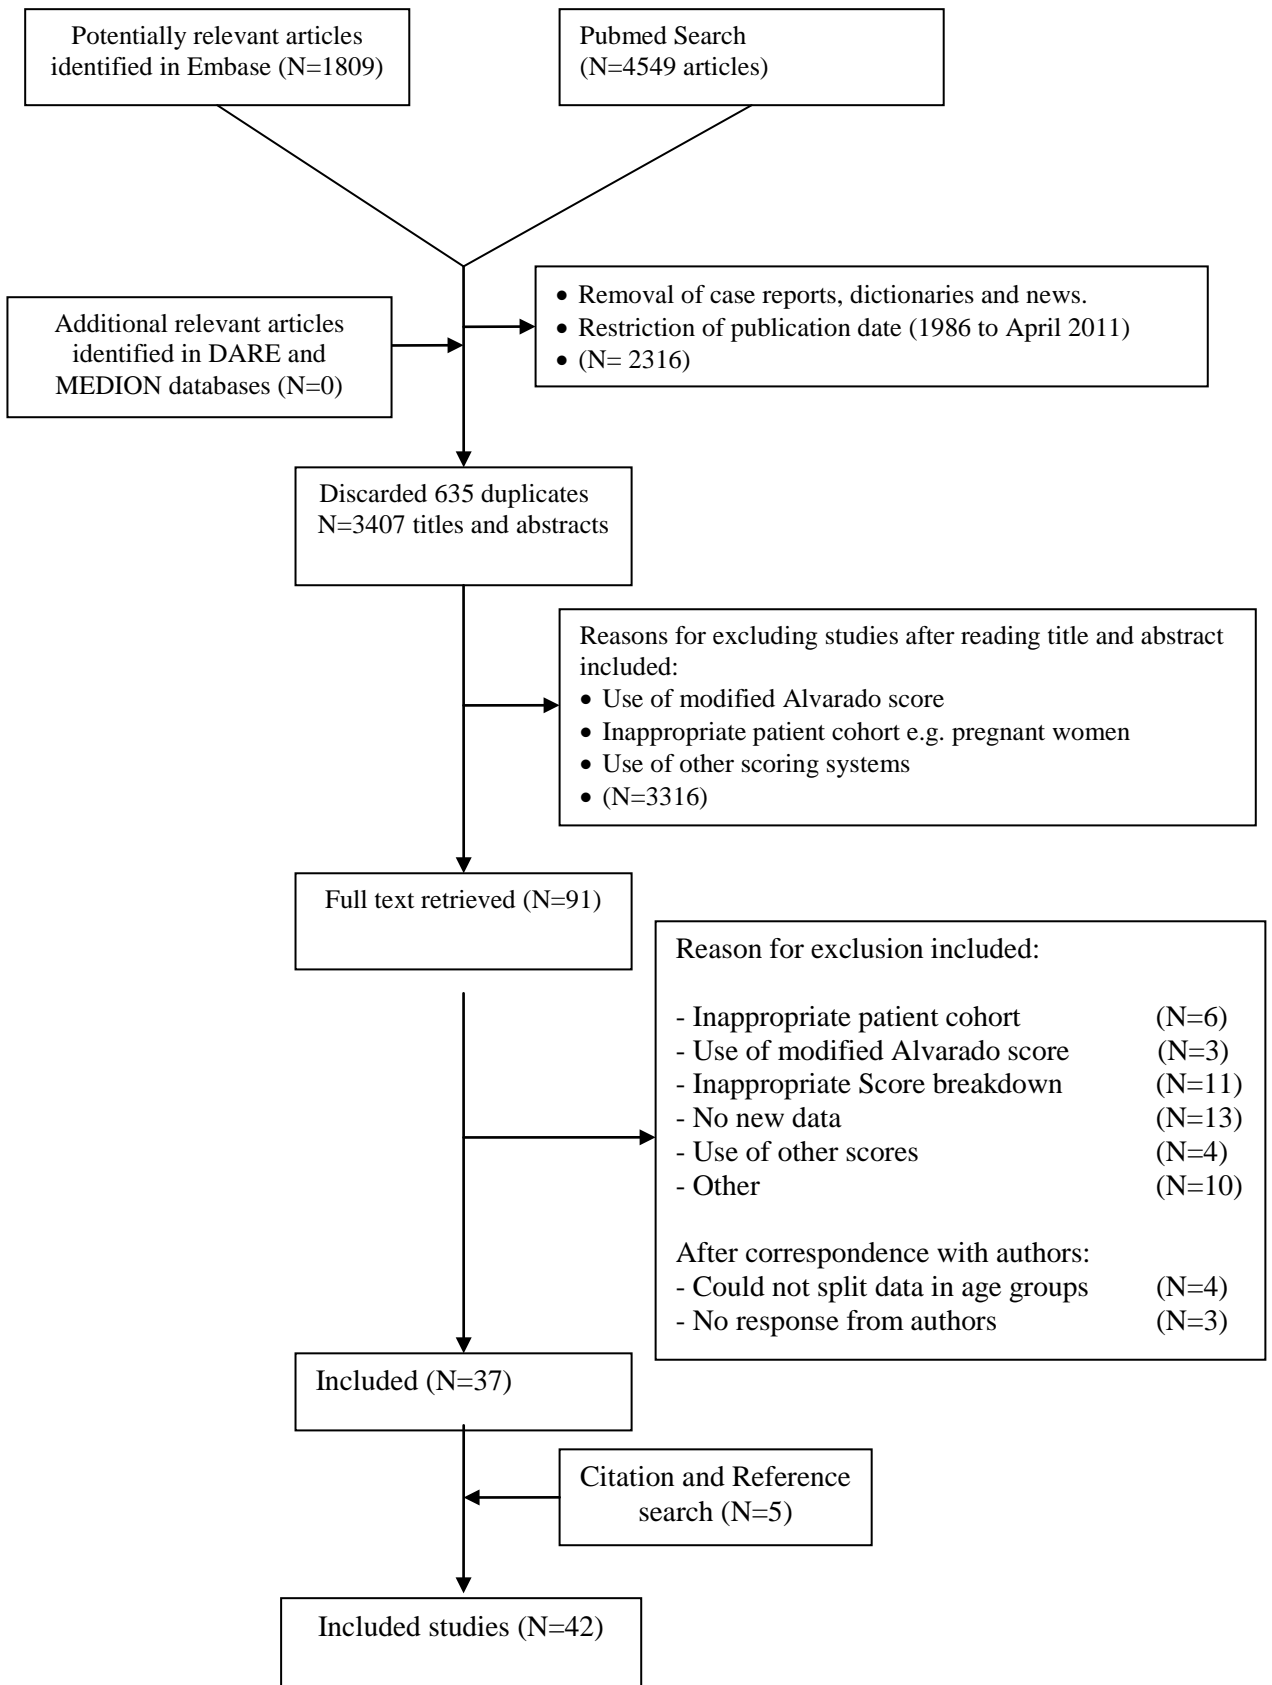

Supplement: MOESM3 [file 9599790]
